# Supplementary material for: One-step synthesis of novel Cu@polymer nanocomposites through a self-activated route and their application as nonenzymatic glucose sensors
Source: Royal Society of Chemistry journal article supplement (doi:10.1039/c7dt01931a), 2017-01-01
Supplement: c7dt01931a1.pdf [file c7dt01931a1.pdf]

## Electronic Supporting Information (ESI)

### One-step synthesis of novel Cu/polymer nanocomposites through a self-activated route and their application as nonenzymatic glucose sensor

Yinlin Tong,<sup>1</sup> Jiaying Xu,<sup>2,3</sup> Hong Jiang,<sup>1</sup> Feng Gao<sup>1,\*</sup>, Qingyi Lu<sup>2,\*</sup>

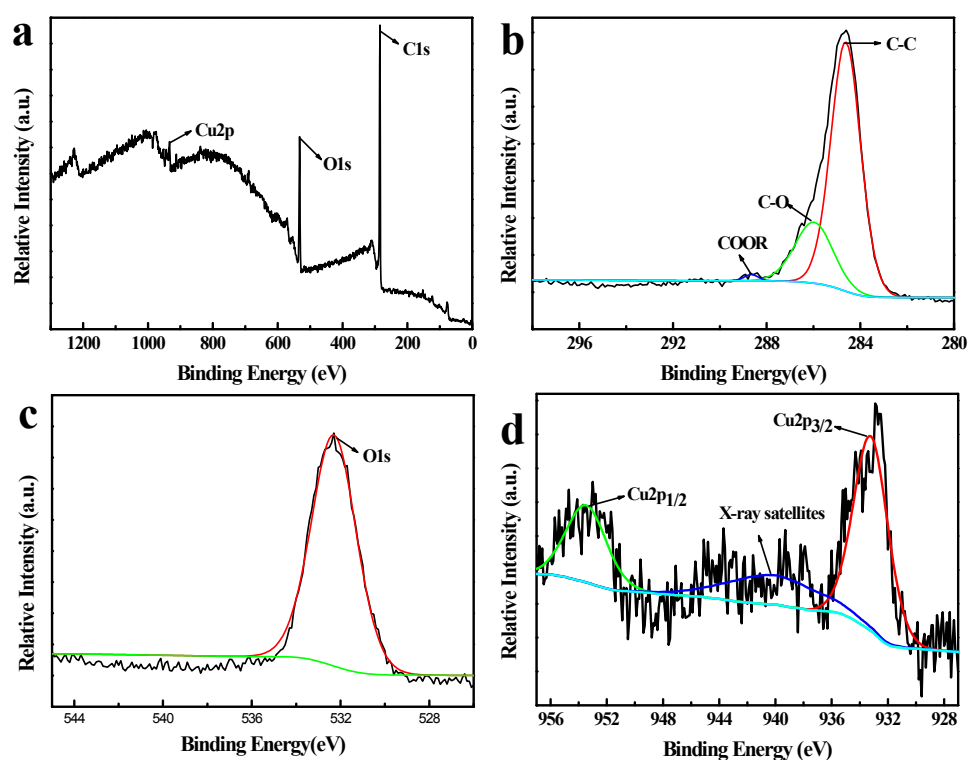

Figure S1 (a) Overall; (b) C1s; (c) O1s and (d) Cu2p spectra of the Cu@polymer nanocomposites.

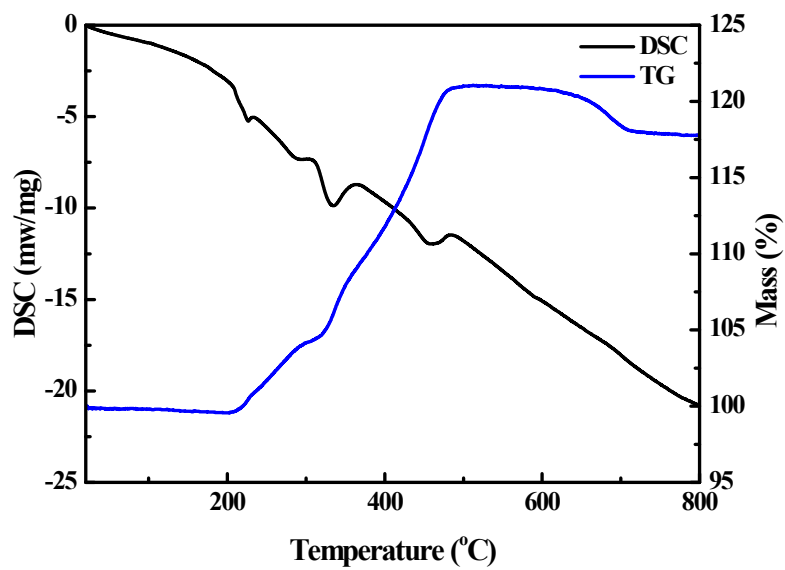

Figure S2 Thermogravimetric analysis (TG) and differential scanning calorimeter (DSC) curves of Cu@polymer nanocomposites in air with 10 °C/min heating rate.

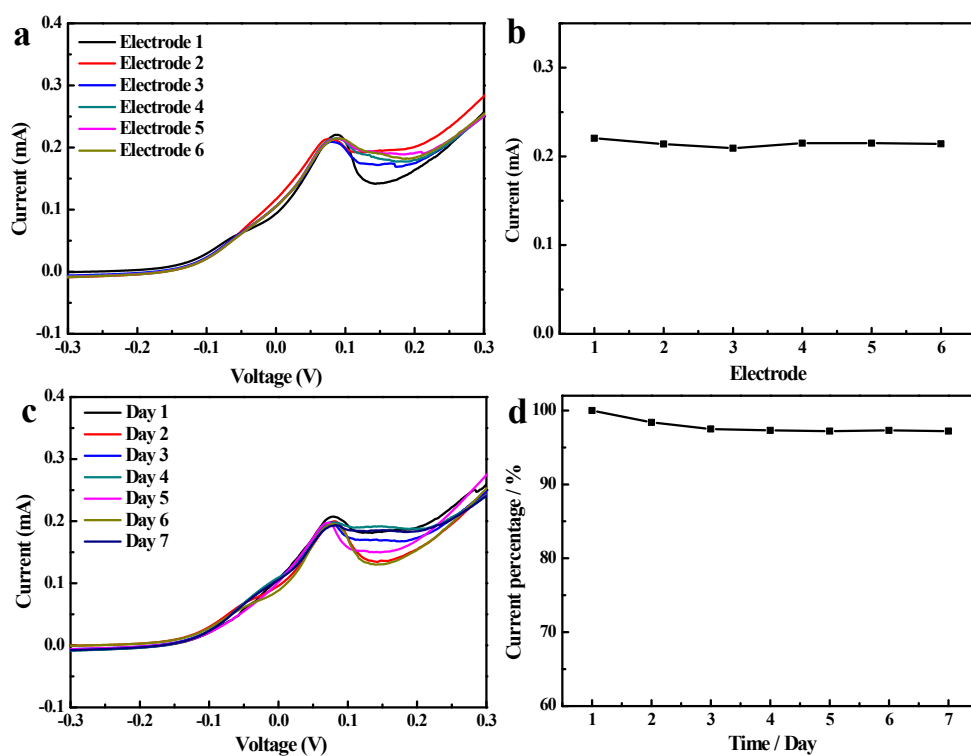

Figure S3 (a) CV curves and (b) Peak current of six parallel Cu/polymer-GCEs for detection of 1 mM glucose; (c) CV curves and (d) Stability of Cu/polymer-GCE for detection of 1 mM glucose for consecutive 7 days.

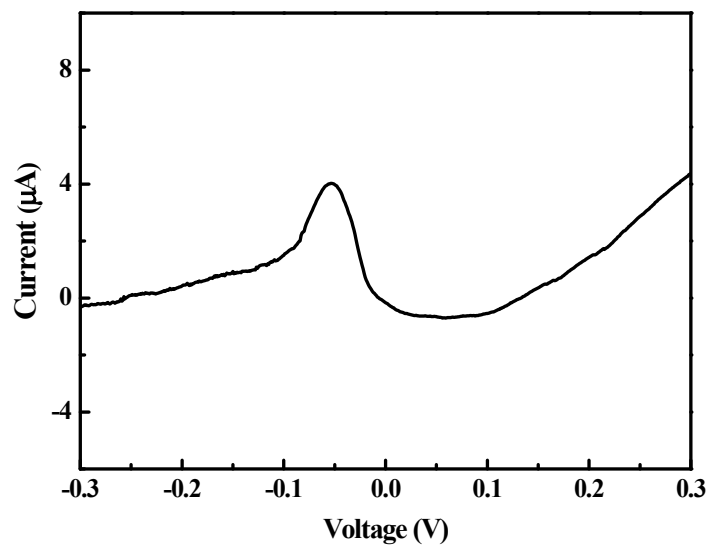

Figure S4 CV curve of Cu/polymer-GCE for detection glucose in serum samples
